# Supplementary material for: A series of Ag(i)–Cd(ii) hetero- and Ag(i) homo-nuclear coordination polymers based on 5-iodo-isophthalic acid and N-donor ancillary ligands
Source: Royal Society of Chemistry journal article supplement (doi:10.1039/c3ce41714j), 2013-10-16
Supplement: c3ce41714j.pdf [file c3ce41714j.pdf]

## Supporting Information

# **A Series of Ag(I)-Cd(II) Hetero- and Ag(I) Homo-nuclear Coordination Polymers Based on 5-Iodo-Isophthalic Acid and N-Donor Ancillary Ligands**

Yong-Li Wei,<sup>a</sup> Xiao-Yuan Li,<sup>a</sup> Ting-Ting Kang,<sup>a</sup> Su-Na Wang,<sup>\*,b</sup> and Shuang-Quan Zang,<sup>\*,a</sup>

<sup>a</sup>College of Chemistry and Molecular Engineering, Zhengzhou University, Zhengzhou 450001, People's Republic of China.

<sup>b</sup>Shandong Provincial Key Laboratory of Chemical Energy Storage and Novel Cell Technology, School of Chemistry and Chemical Engineering, Liaocheng University, Liaocheng, P. R. China. E-mail: wangsuna@lcu.edu.cn; Tel: +86-0635-8230669.

Author for correspondence: Dr. S.-Q. Zang, E-mail: [zangsqzg@zzu.edu.cn](mailto:zangsqzg@zzu.edu.cn).

**Table S1.** Crystal data and structure refinement parameters for complexes **1–5**.

| Compound No.                                                      | 1                                                                                 | 2                                                                                 | 3                                                                | 4                                                                              | 5                                                                               |
|-------------------------------------------------------------------|-----------------------------------------------------------------------------------|-----------------------------------------------------------------------------------|------------------------------------------------------------------|--------------------------------------------------------------------------------|---------------------------------------------------------------------------------|
| formula                                                           | C <sub>36</sub> H <sub>28</sub> N <sub>4</sub> O <sub>11</sub> I <sub>2</sub> CdA | C <sub>40</sub> H <sub>24</sub> N <sub>4</sub> O <sub>9</sub> I <sub>2</sub> CdAg | C <sub>14</sub> H <sub>10</sub> NO <sub>4</sub> IAg <sub>2</sub> | C <sub>20</sub> H <sub>15</sub> N <sub>2</sub> O <sub>4</sub> IAg <sub>2</sub> | C <sub>44</sub> H <sub>34</sub> N <sub>8</sub> O <sub>8</sub> I <sub>2</sub> Ag |
|                                                                   | g <sub>2</sub>                                                                    | 2                                                                                 |                                                                  |                                                                                | 4                                                                               |
| fw                                                                | 1274.58                                                                           | 1286.58                                                                           | 598.87                                                           | 689.98                                                                         | 1488.07                                                                         |
| crystal system                                                    | Monoclinic                                                                        | Monoclinic                                                                        | Monoclinic                                                       | Triclinic                                                                      | Triclinic                                                                       |
| space group                                                       | <i>P</i> 2 <sub>1</sub> / <i>c</i>                                                | <i>P</i> 2 <sub>1</sub> / <i>c</i>                                                | <i>C</i> 2/ <i>c</i>                                             | <i>P</i> $\bar{1}$                                                             | <i>P</i> $\bar{1}$                                                              |
| <i>a</i> (Å)                                                      | 14.0054(3)                                                                        | 15.7940(5)                                                                        | 26.0990(17)                                                      | 9.2367(9)                                                                      | 11.2576(4)                                                                      |
| <i>b</i> (Å)                                                      | 15.1789(3)                                                                        | 13.4071(6)                                                                        | 8.7015(3)                                                        | 9.3456(8)                                                                      | 12.6293(4)                                                                      |
| <i>c</i> (Å)                                                      | 18.5649(3)                                                                        | 17.8147(8)                                                                        | 15.0839(9)                                                       | 13.4445(11)                                                                    | 16.9504(3)                                                                      |
| $\alpha$ (°)                                                      | 90.00                                                                             | 90.00                                                                             | 90.00                                                            | 88.897(7)                                                                      | 102.542(3)                                                                      |
| $\beta$ (°)                                                       | 94.108(2)                                                                         | 93.021(3)                                                                         | 116.468(8)                                                       | 71.282(8)                                                                      | 93.087(3)                                                                       |
| $\gamma$ (°)                                                      | 90.00                                                                             | 90.00                                                                             | 90.00                                                            | 67.893(8)                                                                      | 106.942(3)                                                                      |
| <i>V</i> (Å <sup>3</sup> )                                        | 3936.51(13)                                                                       | 3767.1(3)                                                                         | 3066.5(4)                                                        | 1011.53(16)                                                                    | 2232.56(14)                                                                     |
| <i>Z</i>                                                          | 4                                                                                 | 4                                                                                 | 8                                                                | 2                                                                              | 2                                                                               |
| <i>D</i> <sub>c</sub> (g·cm <sup>-3</sup> )                       | 2.151                                                                             | 2.269                                                                             | 2.594                                                            | 2.265                                                                          | 2.214                                                                           |
| <i>F</i> (000)                                                    | 2432                                                                              | 2448                                                                              | 2240                                                             | 656                                                                            | 1424                                                                            |
| reflns collected                                                  | 15670                                                                             | 14285                                                                             | 6301                                                             | 7642                                                                           | 14176                                                                           |
| Independent reflns                                                | 6923                                                                              | 6616                                                                              | 2697                                                             | 3565                                                                           | 7839                                                                            |
| <i>R</i> (int)                                                    | 0.0297                                                                            | 0.0358                                                                            | 0.0285                                                           | 0.0338                                                                         | 0.0270                                                                          |
| GOF on <i>F</i> <sup>2</sup>                                      | 1.077                                                                             | 1.091                                                                             | 1.064                                                            | 1.001                                                                          | 1.074                                                                           |
| <i>R</i> <sub>1</sub> <sup>a</sup> ( <i>I</i> > 2σ( <i>I</i> ))   | 0.0396                                                                            | 0.0760                                                                            | 0.0387                                                           | 0.0332                                                                         | 0.0492                                                                          |
| w <i>R</i> <sub>2</sub> <sup>b</sup> ( <i>I</i> > 2σ( <i>I</i> )) | 0.0727                                                                            | 0.1563                                                                            | 0.1240                                                           | 0.0665                                                                         | 0.1126                                                                          |

$$^a R_1 = \sum ||F_o| - |F_c|| / \sum |F_o|, \quad ^b wR_2 = [\sum w(F_o^2 - F_c^2)^2 / \sum w(F_o^2)]^{1/2}$$

**Table S2.** Selected Bond Distances and Angles for Compounds **1–5**.

| Compound 1 <sup>a</sup> |            |                   |            |
|-------------------------|------------|-------------------|------------|
| Ag(1)–N(3)              | 2.175(4)   | Ag(1)–N(1)        | 2.160(4)   |
| Ag(2)–N(2)#3            | 2.172(4)   | Ag(2)–N(4)        | 2.171(4)   |
| Ag(2)–O(1W)             | 2.555(5)   | Cd(1)–O(8)#2      | 2.325(4)   |
| Cd(1)–O(4)#1            | 2.247(4)   | Cd(1)–O(6)        | 2.295(3)   |
| Cd(1)–O(1)              | 2.209(4)   | N(3)–Ag(1)–N(1)   | 159.48(18) |
| N(2)#3–Ag(2)–N(4)       | 162.09(19) | N(4)–Ag(2)–O(1W)  | 104.20(18) |
| N(2)#3–Ag(2)–O(1W)      | 92.92(18)  | O(1)–Cd(1)–O(4)#1 | 114.18(15) |
| O(8)#2–Cd(1)–O(4)#1     | 121.14(14) | O(8)#2–Cd(1)–O(1) | 93.58(14)  |
| O(6)–Cd(1)–O(1)         | 121.93(13) | O(8)#2–Cd(1)–O(6) | 117.49(13) |

|                         |            |                     |            |
|-------------------------|------------|---------------------|------------|
| O(4)#1–Cd(1)–O(6)       | 91.07(14)  |                     |            |
| Compound 2 <sup>b</sup> |            |                     |            |
| Ag(1)–N(1)              | 2.422(9)   | Ag(1)–N(2)          | 2.252(9)   |
| Ag(1)–O(4)              | 2.275(7)   | Ag(2)–N(3)          | 2.286(10)  |
| Ag(2)–N(4)              | 2.373(9)   | Ag(2)–O(1)          | 2.526(8)   |
| Cd(1)–O(3)#4            | 2.247(7)   | Cd(1)–O(7)#5        | 2.259(6)   |
| Cd(1)–O(5)              | 2.291(7)   | Cd(1)–O(1)          | 2.355(7)   |
| Cd(1)–O(2)              | 2.472(7)   | Cd(1)–O(6)          | 2.581(7)   |
| N(2)–Ag(1)–O(4)         | 169.3(3)   | N(2)–Ag(1)–N(1)     | 71.2(3)    |
| O(4)–Ag(1)–N(1)         | 111.2(3)   | O(3)#4–Cd(1)–O(7)#5 | 103.1(2)   |
| O(3)#4–Cd(1)–O(5)       | 109.6(3)   | O(7)#5–Cd(1)–O(5)   | 123.9(2)   |
| O(3)#4–Cd(1)–O(1)       | 118.3(2)   | O(7)#5–Cd(1)–O(1)   | 120.8(3)   |
| O(5)–Cd(1)–O(1)         | 80.8(2)    | O(3)#2–Cd(1)–O(2)   | 85.7(3)    |
| O(7)#1–Cd(1)–O(2)       | 92.7(2)    | O(5)–Cd(1)–O(2)     | 133.1(2)   |
| O(1)–Cd(1)–O(2)         | 53.8(2)    | O(3)#4–Cd(1)–O(6)   | 89.1(2)    |
| O(7)#5–Cd(1)–O(6)       | 83.7(2)    | O(5)–Cd(1)–O(6)     | 53.5(2)    |
| O(1)–Cd(1)–O(6)         | 133.3(2)   | O(2)–Cd(1)–O(6)     | 172.8(2)   |
| N(3)–Ag(2)–N(4)         | 72.1(3)    | N(3)–Ag(2)–O(1)     | 96.6(3)    |
| N(4)–Ag(2)–O(1)         | 92.6(3)    |                     |            |
| Compound 3 <sup>c</sup> |            |                     |            |
| Ag(1)–N(1)              | 2.141(6)   | Ag(1)–O(1)          | 2.227(5)   |
| Ag(2)–O(4)#1            | 2.204(5)   | Ag(2)–O(3)          | 2.207(4)   |
| Ag(2)–O(2)#2            | 2.468(5)   | N(1)–Ag(1)–O(1)     | 144.2(2)   |
| O(4)#1–Ag(2)–O(3)       | 159.4(2)   | O(4)#1–Ag(2)–O(2)#2 | 104.31(19) |
| O(3)–Ag(2)–O(2)#2       | 91.69(18)  |                     |            |
| Compound 4 <sup>d</sup> |            |                     |            |
| Ag(1)–O(2)#1            | 2.194(3)   | Ag(1)–O(1)          | 2.241(3)   |
| Ag(1)–O(4)#2            | 2.486(3)   | Ag(2)–N(2)          | 2.179(4)   |
| Ag(2)–N(1)              | 2.197(4)   | O(2)#1–Ag(1)–O(1)   | 158.62(13) |
| O(2)#1–Ag(1)–O(4)#2     | 99.81(12)  | O(1)–Ag(1)–O(4)#2   | 96.43(12)  |
| N(2)–Ag(2)–N(1)         | 165.43(15) |                     |            |

| Compound 5 <sup>e</sup> |            |                   |            |
|-------------------------|------------|-------------------|------------|
| Ag(1)–O(1)              | 2.305(4)   | Ag(1)–O(7)        | 2.339(4)   |
| Ag(1)–O(8)#4            | 2.404(4)   | Ag(2)–O(4)        | 2.107(4)   |
| Ag(2)–O(4) #5           | 2.113(3)   | Ag(5)–N(8)#6      | 2.097(4)   |
| Ag(5)–N(8)              | 2.097(5)   | Ag(3)–N(1)        | 2.222(5)   |
| Ag(3)–O(6)              | 2.365(4)   | Ag(3)–O(3) #1     | 2.458(4)   |
| Ag(3)–O(5)              | 2.569(4)   | Ag(4)–N(5)        | 2.121(5)   |
| Ag(4)–N(4)              | 2.124(5)   | O(1)–Ag(1)–O(7)   | 102.97(16) |
| O(1)–Ag(1)–O(8)#4       | 129.32(14) | O(7)–Ag(1)–O(8)#4 | 124.42(15) |
| O(4)–Ag(2)–O(4)#5       | 180.000(2) | N(8)–Ag(5)–N(8)#3 | 180.00(17) |
| N(1)–Ag(3)–O(6)         | 160.04(17) | N(1)–Ag(3)–O(3)#1 | 103.02(16) |
| O(6)–Ag(3)–O(3)#1       | 96.41(14)  | N(1)–Ag(3)–O(5)   | 121.49(16) |
| O(6)–Ag(3)–O(5)         | 53.09(13)  | O(3)#1–Ag(3)–O(5) | 90.48(14)  |
| N(5)–Ag(4)–N(4)         | 174.0(2)   |                   |            |

Symmetry codes: <sup>a</sup>#1 x-1, -y+1/2, z+1/2; #2 x, y-1, z; #3 x+1, y, z. <sup>b</sup>#4 1-x, y+1/2, 1/2-z; #5 -x+2, y-1/2, 1/2-z. <sup>c</sup>#1 -x+1, -y+3, -z; #2 x, y+1, z. <sup>d</sup>#1 -x+2,-y,-z; #2 -x+1,-y+1,-z. <sup>e</sup>#1 -x, -y+1, -z+1; #2 -x-1, -y+1, -z+2; #3 -x+2, -y+2, -z-1. #4 -x, -y, -z; #5 x+1, y, z-1. #6 x-1, y-1, z.

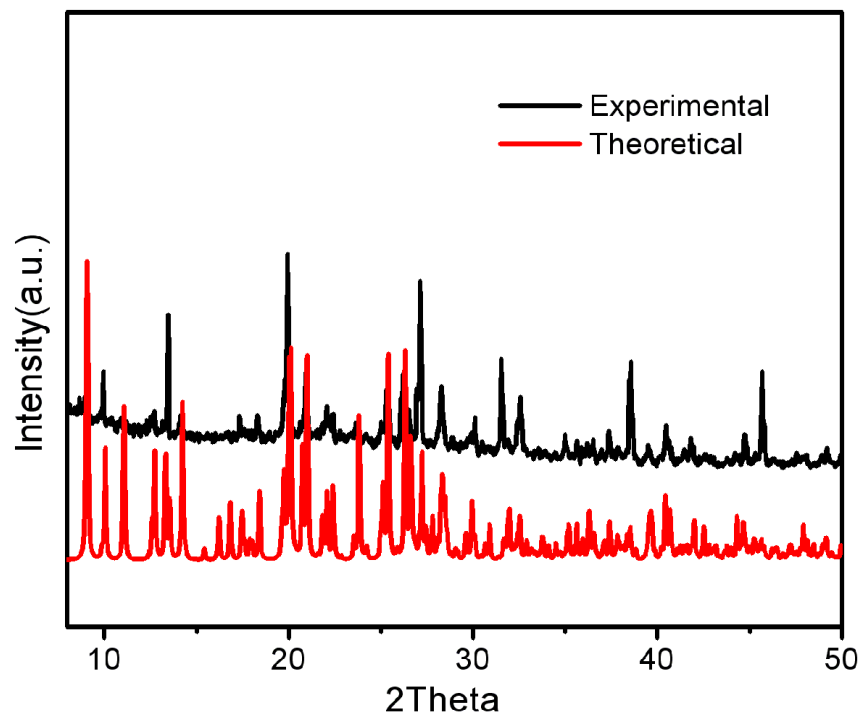

**Figure S1.** The theoretical and experimental PXR D patterns for 1.

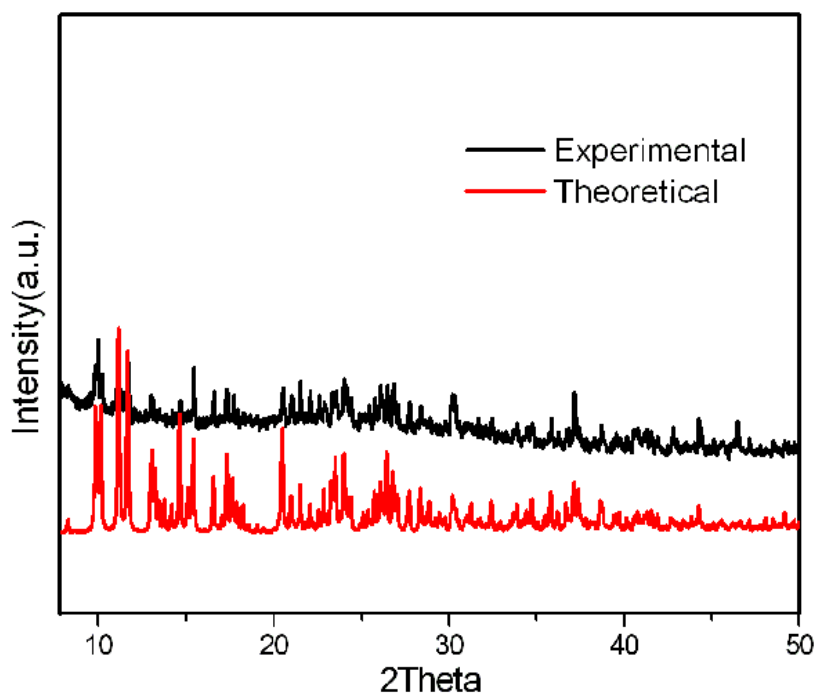

**Figure S2.** The theoretical and experimental PXR D patterns for 2.

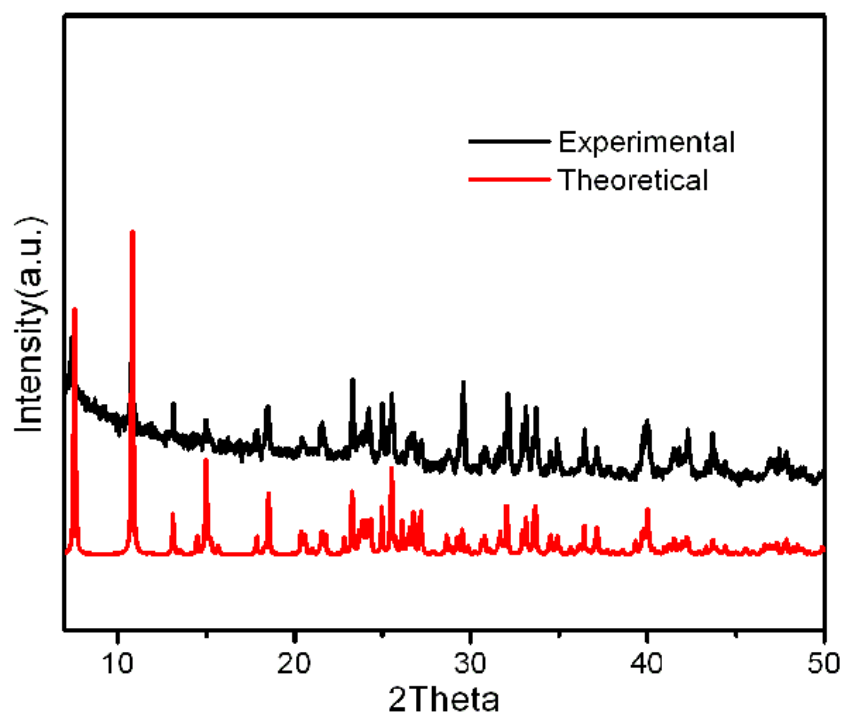

**Figure S3.** The theoretical and experimental PXR D patterns for **3**.

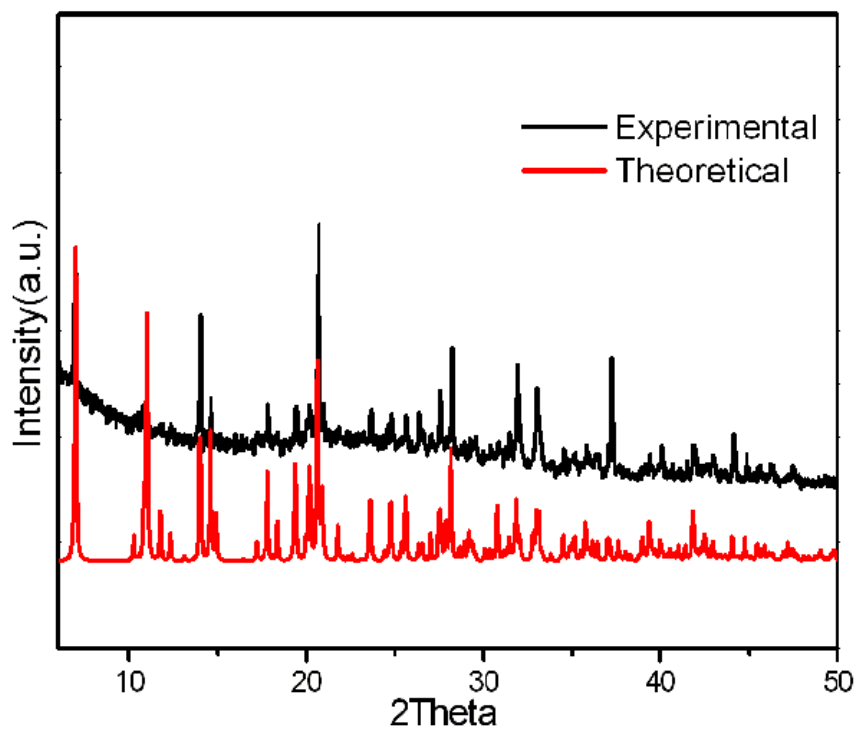

**Figure S4.** The theoretical and experimental PXR D patterns for **4**.

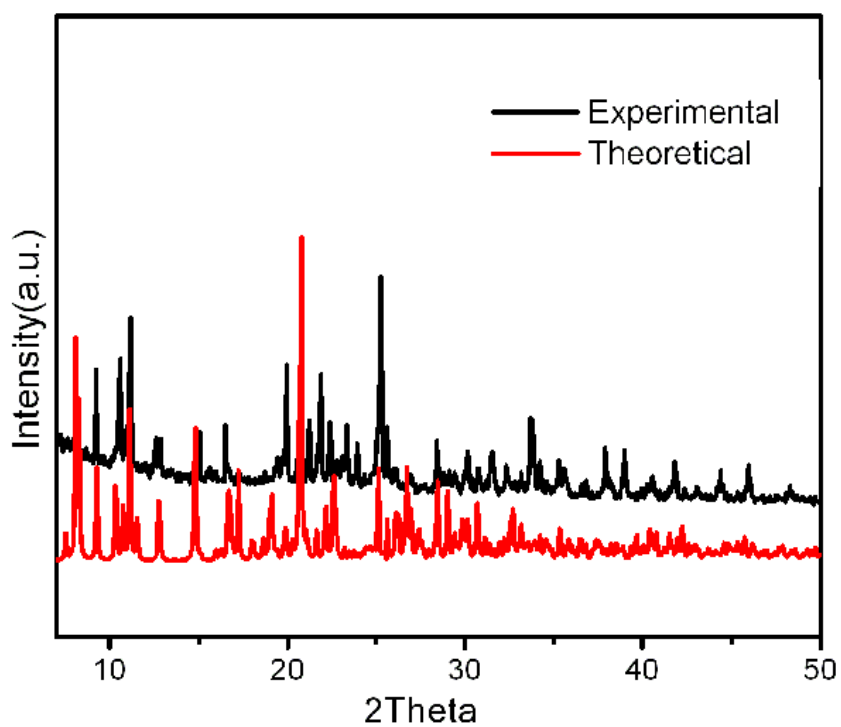

**Figure S5.** The theoretical and experimental PXR D patterns for 5.

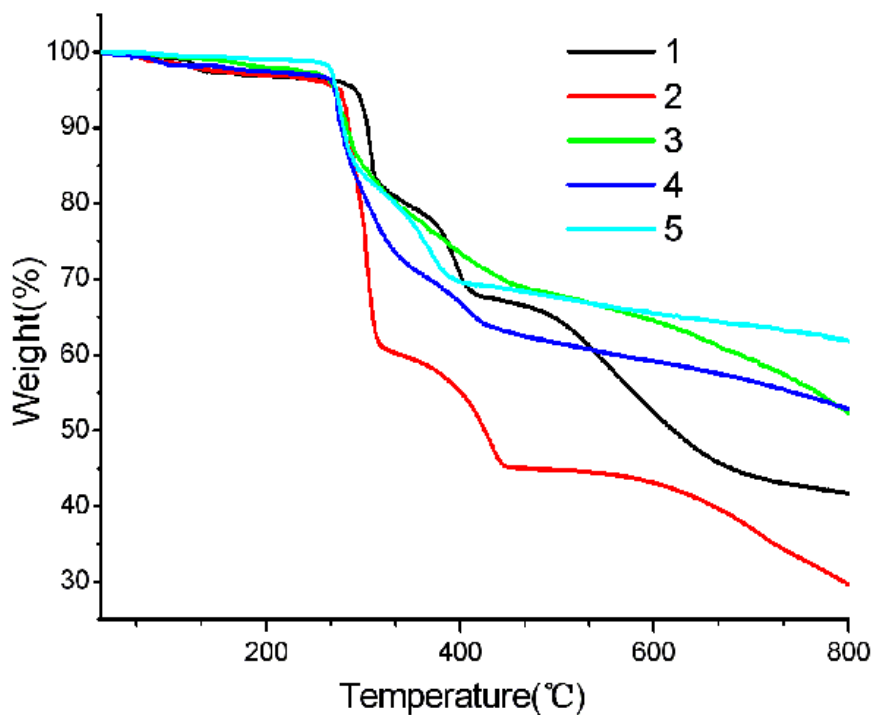

**Figure S6.** TG curves for compounds 1–5.

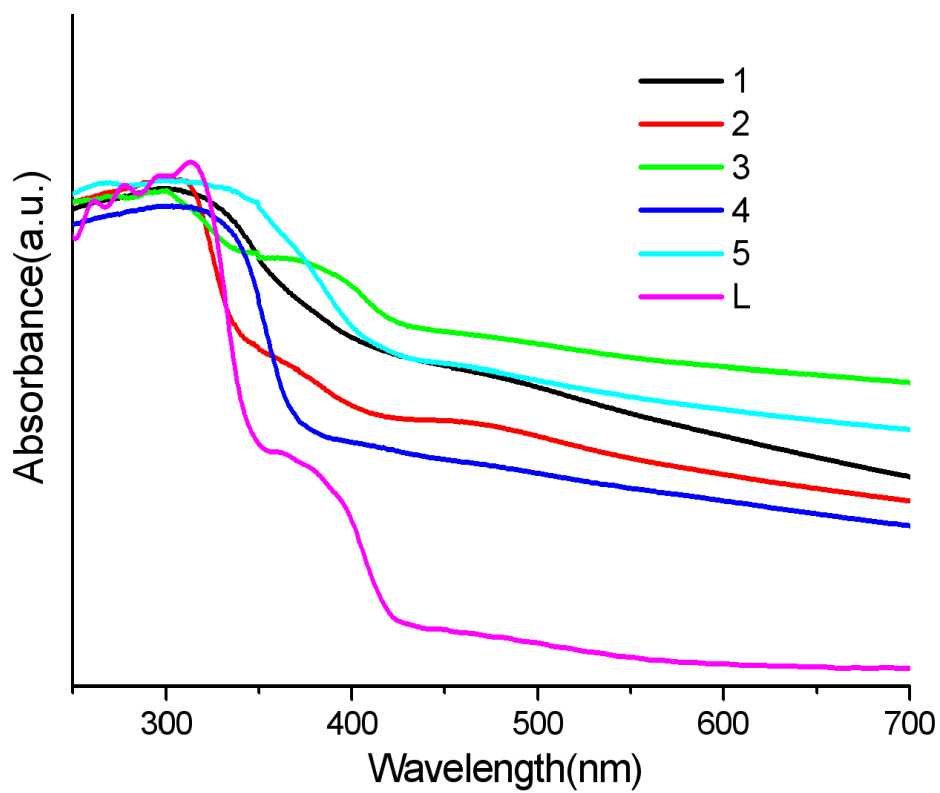

**Figure S7.** UV-vis absorption spectre for ligand and compounds **1–5**.
